# Supplementary material for: RAAAF’s office landscape The End of Sitting: Energy expenditure and temporary comfort when working in non-sitting postures
Source: PubMed Central journal article supplement (PMC5681262; doi:10.1371/journal.pone.0187529), 2017-11-10
Supplement: pone.0187529.s001.pdf [file pone.0187529.s001.pdf]

Table 1: Sample characteristics and physical intensity of working in the test conditions

| Participant | Gender | Age (years) | Weight (kg) | Height (cm) | Physical intensity |          |           |           |           |            |         |          |           |           |           |            |         |          |           |           |           |            |
|-------------|--------|-------------|-------------|-------------|--------------------|----------|-----------|-----------|-----------|------------|---------|----------|-----------|-----------|-----------|------------|---------|----------|-----------|-----------|-----------|------------|
|             |        |             |             |             | Energy expenditure |          |           |           |           |            | MET     |          |           |           |           | Heart rate |         |          |           |           |           |            |
|             |        |             |             |             | sitting            | standing | Curled up | Lean back | Front low | Front high | sitting | standing | Curled up | Lean back | Front low | Front high | sitting | standing | Curled up | Lean back | Front low | Front high |
| 1.00        | male   | 23.00       | 83.10       | 179.00      | 1.59               | 1.59     | 1.90      | 1.54      | 1.86      | 1.67       | 1.12    | 1.14     | 1.37      | 1.10      | 1.33      | 1.19       | 68.96   | 76.35    | 67.12     | 68.64     | 67.75     | 74.84      |
| 2.00        | female | 21.00       | 75.50       | 172.50      | 1.50               | 1.44     | 1.45      | 1.34      | 1.54      | 1.62       | 1.19    | 1.14     | 1.15      | 1.08      | 1.24      | 1.31       | 67.33   | 81.71    | 75.08     | 67.80     | 70.46     | 66.32      |
| 3.00        | female | 20.00       | 57.10       | 174.50      | 1.34               | 1.43     | 1.49      | 1.33      | 1.43      | 1.43       | 1.41    | 1.51     | 1.57      | 1.40      | 1.53      | 1.51       | 77.76   | 81.03    | 80.48     | 82.83     | 79.82     | 80.16      |
| 4.00        | male   | 22.00       | 87.30       | 198.00      | 1.89               | 2.12     | 2.65      | 2.27      | 2.28      | 2.22       | 1.29    | 1.44     | 1.79      | 1.54      | 1.55      | 1.52       | 58.21   | 67.30    | 71.09     | 74.00     | 72.20     | 65.05      |
| 5.00        | male   | 25.00       | 85.50       | 191.00      | 1.70               | 1.85     | 1.99      | 1.96      | 2.22      | 2.16       | 1.20    | 1.31     | 1.40      | 1.38      | 1.57      | 1.53       | 56.29   | 66.08    | 61.11     | 72.50     | 82.15     | 76.85      |
| 6.00        | male   | 26.00       | 80.40       | 183.00      | 1.72               | 1.76     | 2.39      | 1.86      | 1.68      | 1.66       | 1.30    | 1.35     | 1.82      | 1.42      | 1.27      | 1.26       | 68.64   | 71.40    | 68.20     | 69.69     | 71.82     | 78.89      |
| 7.00        | male   | 23.00       | 63.00       | 170.50      | 1.66               | 1.96     | 1.72      | 1.53      | 1.72      | 1.97       | 1.61    | 1.90     | 1.66      | 1.48      | 1.67      | 1.91       | 55.49   | 59.81    | 52.64     | 51.26     | 54.90     | 57.42      |
| 8.00        | male   | 27.00       | 72.70       | 186.50      | 1.83               | 2.18     | 2.27      | 2.06      | 2.03      | 1.92       | 1.51    | 1.79     | 1.87      | 1.73      | 1.70      | 1.60       | 84.57   | 86.77    | 86.01     | 81.21     | 84.79     | 80.24      |
| 9.00        | female | 23.00       | 52.20       | 170.00      | 1.67               | 1.75     | 2.08      | 1.51      | 1.69      | 1.53       | 1.96    | 2.05     | 2.44      | 1.77      | 1.99      | 1.79       | 70.92   | 86.10    | 61.98     | 79.74     | 78.02     | 77.61      |
| 10.00       | female | 25.00       | 66.30       | 175.00      | 1.42               | 1.54     | 1.65      | 1.58      | 1.55      | 1.60       | 1.29    | 1.39     | 1.49      | 1.43      | 1.41      | 1.46       | 61.70   | 70.91    | 69.10     | 72.98     | 73.06     | 67.79      |
| 11.00       | male   | 21.00       | 74.10       | 185.00      | 1.99               | 2.50     | 2.25      | 1.98      | 2.22      | 2.15       | 1.61    | 2.03     | 1.82      | 1.59      | 1.78      | 1.72       |         |          |           |           |           |            |
| 12.00       | female | 23.00       | 82.50       | 183.00      | 1.72               | 1.55     | 2.61      | 1.55      | 1.81      | 1.53       | 1.23    | 1.12     | 1.88      | 1.13      | 1.31      | 1.11       | 87.52   | 94.43    | 87.56     | 97.68     | 90.84     | 99.90      |
| 13.00       | female | 23.00       | 62.30       | 175.00      | 1.22               | 1.43     | 1.17      | 1.44      | 1.68      | 1.56       | 1.18    | 1.38     | 1.14      | 1.40      | 1.64      | 1.52       | 75.09   | 86.72    | 81.52     | 76.76     | 80.58     | 80.49      |
| 14.00       | male   | 22.00       | 94.30       | 192.00      | 1.77               | 2.35     | 2.12      | 2.07      | 1.96      | 1.84       | 1.15    | 1.52     | 1.37      | 1.35      | 1.28      | 1.19       | 56.58   | 75.38    | 69.26     | 71.10     | 63.84     | 62.59      |
| 15.00       | female | 22.00       | 73.90       | 180.00      | 1.62               | 1.76     | 2.00      | 1.57      | 1.89      | 1.82       | 1.34    | 1.46     | 1.65      | 1.29      | 1.56      | 1.50       |         |          |           |           |           |            |
| 16.00       | female | 23.00       | 78.60       | 169.00      | 1.91               | 2.05     | 2.34      | 2.21      | 1.91      | 2.09       | 1.46    | 1.59     | 1.81      | 1.70      | 1.46      | 1.61       | 63.83   | 68.52    | 63.89     | 76.31     | 87.88     | 81.62      |
| 17.00       | female | 24.00       | 74.50       | 174.00      | 1.50               | 1.45     | 1.58      | 1.45      | 1.59      | 1.66       | 1.19    | 1.17     | 1.27      | 1.17      | 1.27      | 1.32       | 52.86   | 51.76    | 51.06     | 53.26     | 59.83     | 62.14      |
| 18.00       | female | 23.00       | 64.70       | 167.00      | 1.38               | 1.35     | 1.62      | 1.45      | 1.45      | 1.40       | 1.28    | 1.28     | 1.51      | 1.36      | 1.36      | 1.31       | 57.36   | 66.77    | 56.87     | 56.62     | 61.44     | 64.82      |
| 19.00       | female | 24.00       | 66.80       | 178.00      | 1.48               | 1.75     | 1.56      | 1.33      | 1.41      | 1.37       | 1.32    | 1.58     | 1.40      | 1.20      | 1.28      | 1.24       | 70.24   | 87.39    | 76.71     | 66.53     | 69.41     | 74.32      |
| 20.00       | male   | 27.00       | 78.90       | 192.00      | 1.44               | 1.57     | 1.99      | 1.57      | 1.63      | 1.53       | 1.09    | 1.19     | 1.50      | 1.19      | 1.24      | 1.16       | 57.07   | 75.38    | 70.71     | 74.53     | 65.20     | 66.59      |
| 21.00       | female | 22.00       | 66.80       | 165.00      | 1.23               | 1.30     | 1.42      | 1.80      | 1.53      | 1.39       | 1.07    | 1.13     | 1.22      | 1.55      | 1.32      | 1.21       |         |          |           |           |           |            |
| 22.00       | female | 21.00       | 54.10       | 167.00      | 1.24               | 1.44     | 1.28      | 1.32      | 1.39      | 1.42       | 1.36    | 1.60     | 1.41      | 1.46      | 1.53      | 1.57       | 64.64   | 68.08    | 64.87     | 74.65     | 79.41     | 82.82      |
| 23.00       | male   | 22.00       | 81.10       | 186.00      | 1.62               | 2.00     | 2.49      | 1.74      | 1.99      | 2.32       | 1.18    | 1.48     | 1.83      | 1.28      | 1.46      | 1.70       | 76.03   | 79.95    | 72.29     | 76.94     | 85.57     | 100.12     |
| 24.00       | female | 23.00       | 63.30       | 174.00      | 1.46               | 1.86     | 1.49      | 1.61      | 1.53      | 1.68       | 1.38    | 1.79     | 1.43      | 1.54      | 1.46      | 1.59       | 79.12   | 79.31    | 80.13     | 80.55     | 80.30     | 87.02      |

Table 2. Perceived temporary comfort and productivity when working in the test conditions

| Participant | Temporary comfort                  |          |           |           |           |            |                                    |          |           |           |           |            | Productivity          |          |           |           |           |            |
|-------------|------------------------------------|----------|-----------|-----------|-----------|------------|------------------------------------|----------|-----------|-----------|-----------|------------|-----------------------|----------|-----------|-----------|-----------|------------|
|             | General Comfort Score (scale 0-20) |          |           |           |           |            | number of uncomfortable body areas |          |           |           |           |            | number of words found |          |           |           |           |            |
|             | sitting                            | standing | Curled up | Lean back | Front low | Front high | sitting                            | standing | Curled up | Lean back | Front low | Front high | sitting               | standing | Curled up | Lean back | Front low | Front high |
| 1           | 3                                  | 4        | 4         | 3         | 3         | 4          | 1                                  | 4        | 5         | 6         | 4         | 5          | 24                    | 27       | 24        | 36        | 29        | 25         |
| 2           | 2                                  | 6        | 4         | 2         | 0         | 2          | 0                                  | 1        | 1         | 0         | 0         | 1          | 36                    | 16       | 26        | 28        | 33        | 23         |
| 3           | 5                                  | 13       | 5         | 2         | 13        | 3          | 2                                  | 2        | 2         | 1         | 2         | 2          | 18                    | 14       | 11        | 14        | 10        | 12         |
| 4           | 2                                  | 6        | 8         | 7         | 4         | 4          | 3                                  | 5        | 5         | 4         | 5         | 3          | 22                    | 28       | 23        | 20        | 24        | 28         |
| 5           | 3                                  | 4        | 12        | 4         | 10        | 4          | 0                                  | 0        | 2         | 0         | 1         | 1          | 13                    | 17       | 14        | 13        | 9         | 15         |
| 6           | 13                                 | 7        | 4         | 4         | 8         | 5          | 2                                  | 2        | 1         | 1         | 2         | 1          | 28                    | 22       | 22        | 19        | 23        | 20         |
| 7           | 2                                  | 3        | 3         | 3         | 2         | 3          | 0                                  | 1        | 1         | 1         | 1         | 1          | 12                    | 19       | 19        | 24        | 25        | 17         |
| 8           | 2                                  | 4        | 4         | 2         | 2         | 2          | 0                                  | 1        | 1         | 0         | 0         | 0          | 31                    | 18       | 22        | 33        | 26        | 23         |
| 9           | 5                                  | 13       | 9         | 5         | 14        | 7          | 1                                  | 1        | 3         | 2         | 2         | 2          | 19                    | 13       | 12        | 18        | 11        | 10         |
| 10          | 2                                  | 6        | 8         | 4         | 2         | 8          | 1                                  | 3        | 2         | 0         | 0         | 1          | 31                    | 29       | 22        | 29        | 27        | 21         |
| 11          | 4                                  | 4        | 6         | 8         | 4         | 6          | 1                                  | 3        | 2         | 2         | 0         | 1          | 24                    | 31       | 30        | 22        | 15        | 27         |
| 12          | 5                                  | 6        | 12        | 6         | 5         | 5          | 1                                  | 1        | 4         | 3         | 2         | 2          | 28                    | 26       | 25        | 33        | 28        | 28         |
| 13          | 3                                  | 3        | 1         | 2         | 1         | 4          | 1                                  | 2        | 2         | 1         | 1         | 1          | 30                    | 25       | 30        | 25        | 34        | 30         |
| 14          | 3                                  | 11       | 9         | 16        | 5         | 8          | 1                                  | 2        | 3         | 3         | 2         | 2          | 13                    | 18       | 12        | 15        | 15        | 15         |
| 15          | 14                                 | 13       | 9         | 3         | 5         | 2          | 1                                  | 3        | 2         | 1         | 1         | 0          | 26                    | 26       | 20        | 14        | 22        | 21         |
| 16          | 4                                  | 4        | 0         | 6         | 10        | 6          | 2                                  | 3        | 1         | 2         | 0         | 2          | 12                    | 22       | 20        | 20        | 10        | 21         |
| 17          | 4                                  | 4        | 3         | 2         | 2         | 6          | 1                                  | 1        | 1         | 1         | 1         | 1          | 32                    | 35       | 32        | 33        | 38        | 27         |
| 18          | 0                                  | 6        | 14        | 12        | 4         | 6          | 0                                  | 2        | 2         | 2         | 1         | 1          | 26                    | 32       | 27        | 32        | 31        | 26         |
| 19          | 2                                  | 5        | 4         | 4         | 2         | 3          | 1                                  | 2        | 2         | 2         | 1         | 1          | 17                    | 10       | 19        | 18        | 22        | 25         |
| 20          | 3                                  | 3        | 4         | 3         | 5         | 5          | 1                                  | 0        | 2         | 2         | 1         | 1          | 21                    | 26       | 14        | 22        | 22        | 23         |
| 21          | 2                                  | 4        | 8         | 12        | 14        | 4          | 1                                  | 2        | 2         | 3         | 4         | 3          | 19                    | 19       | 18        | 16        | 16        | 16         |
| 22          | 3                                  | 4        | 6         | 4         | 3         | 7          | 0                                  | 0        | 1         | 0         | 0         | 2          | 18                    | 20       | 15        | 23        | 20        | 26         |
| 23          | 3                                  | 4        | 8         | 2         | 4         | 5          | 1                                  | 1        | 2         | 0         | 1         | 2          | 23                    | 16       | 21        | 20        | 17        | 12         |
| 24          | 2                                  | 6        | 3         | 2         | 2         | 4          | 1                                  | 1        | 1         | 0         | 0         | 0          | 24                    | 21       | 23        | 29        | 22        | 14         |
