# Supplementary material for: RAAAF’s office landscape The End of Sitting: Energy expenditure and temporary comfort when working in non-sitting postures
Source: PubMed Central journal article supplement (PMC5681262; doi:10.1371/journal.pone.0187529), 2017-11-10
Supplement: pone.0187529.s002.pdf [file pone.0187529.s002.pdf]

Table 3. Body areas with discomfort in each test condition

| Participant | sitting |           |      |            |            |          |            |            |      |
|-------------|---------|-----------|------|------------|------------|----------|------------|------------|------|
|             | Neck    | Shoulders | Arms | Upper back | Lower back | Buttocks | Upper legs | Lower legs | Feet |
| 1           | 0       | 0         | 0    | 1          | 0          | 0        | 0          | 0          | 0    |
| 2           | 0       | 0         | 0    | 0          | 0          | 0        | 0          | 0          | 0    |
| 3           | 1       | 0         | 0    | 0          | 0          | 0        | 0          | 0          | 1    |
| 4           | 0       | 1         | 1    | 0          | 0          | 1        | 0          | 0          | 0    |
| 5           | 0       | 0         | 0    | 0          | 0          | 0        | 0          | 0          | 0    |
| 6           | 1       | 1         | 0    | 0          | 0          | 0        | 0          | 0          | 0    |
| 7           | 0       | 0         | 0    | 0          | 0          | 0        | 0          | 0          | 0    |
| 8           | 0       | 0         | 0    | 0          | 0          | 0        | 0          | 0          | 0    |
| 9           | 1       | 0         | 0    | 0          | 0          | 0        | 0          | 0          | 0    |
| 10          | 1       | 0         | 0    | 0          | 0          | 0        | 0          | 0          | 0    |
| 11          | 1       | 0         | 0    | 0          | 0          | 0        | 0          | 0          | 0    |
| 12          | 0       | 0         | 0    | 0          | 1          | 0        | 0          | 0          | 0    |
| 13          | 1       | 0         | 0    | 0          | 0          | 0        | 0          | 0          | 0    |
| 14          | 1       | 0         | 0    | 0          | 0          | 0        | 0          | 0          | 0    |
| 15          | 1       | 0         | 0    | 0          | 0          | 0        | 0          | 0          | 0    |
| 16          | 1       | 1         | 0    | 0          | 0          | 0        | 0          | 0          | 0    |
| 17          | 1       | 0         | 0    | 0          | 0          | 0        | 0          | 0          | 0    |
| 18          | 0       | 0         | 0    | 0          | 0          | 0        | 0          | 0          | 0    |
| 19          | 1       | 0         | 0    | 0          | 0          | 0        | 0          | 0          | 0    |
| 20          | 0       | 0         | 0    | 1          | 0          | 0        | 0          | 0          | 0    |
| 21          | 1       | 0         | 0    | 0          | 0          | 0        | 0          | 0          | 0    |
| 22          | 0       | 0         | 0    | 0          | 0          | 0        | 0          | 0          | 0    |
| 23          | 1       | 0         | 0    | 0          | 0          | 0        | 0          | 0          | 0    |
| 24          | 0       | 0         | 0    | 1          | 0          | 0        | 0          | 0          | 0    |
